# Supplementary material for: Predictive value for cardiovascular events of common carotid intima media thickness and its rate of change in individuals at high cardiovascular risk – Results from the PROG-IMT collaboration
Source: PubMed Central journal article supplement (PMC5896895; doi:10.1371/journal.pone.0191172), 2018-04-12
Supplement: pone.0191172.s003.pdf [file pone.0191172.s003.pdf]

| Study      | Third party owned | Restrictions against public data sharing                                                                                                           | Availability and contact                                                                                                                                                                                                                                                                                                                                                                           |
|------------|-------------------|----------------------------------------------------------------------------------------------------------------------------------------------------|----------------------------------------------------------------------------------------------------------------------------------------------------------------------------------------------------------------------------------------------------------------------------------------------------------------------------------------------------------------------------------------------------|
| AIR        | No                | Swedish law regarding personal information, PROG-IMT policy                                                                                        | Data can be shared on a scientific collaborative basis (Contact: <a href="mailto:Goran.Bergstrom@hjl.gu.se">Goran.Bergstrom@hjl.gu.se</a> )                                                                                                                                                                                                                                                        |
| ARIC       | Yes               | None, available via BioLincc                                                                                                                       | <a href="https://biolincc.nhlbi.nih.gov/studies/aric/">https://biolincc.nhlbi.nih.gov/studies/aric/</a>                                                                                                                                                                                                                                                                                            |
| AtheroGene | No                | The ethical vote does not cover data transfer outside the study center                                                                             | Transfer of data is strictly prohibited. For the purpose of the current analysis, the AtheroGene data were analysed by a member of the Mainz biometric team – Irene Schmidtman – following specific statistical models provided by central statistics of PROG-IMT*. Requests on similar collaboration may be considered (Contact: <a href="mailto:s.blankenberg@uke.de">s.blankenberg@uke.de</a> ) |
| BHS        | Yes               | PROG-IMT policy                                                                                                                                    | Data can be shared on a scientific collaborative basis (Contact: <a href="mailto:berenson@tulane.edu">berenson@tulane.edu</a> )                                                                                                                                                                                                                                                                    |
| Bruneck    | No                | Open access to the study data is not covered by the signed informed agreements of the study participants and the approval of the ethics committee. | Anonymised data are available on request for researchers who meet the criteria for access to confidential data, including accreditation as approved researcher by the local data sharing committee and signing of a data sharing agreement with the study. (Contact: <a href="mailto:Vascage@i-med.ac.at">Vascage@i-med.ac.at</a> )                                                                |
| CAPS       | No                | PROG-IMT policy                                                                                                                                    | Data can be shared on a scientific collaborative basis (Contact: <a href="mailto:matthias.lorenz@em.uni-frankfurt.de">matthias.lorenz@em.uni-frankfurt.de</a> )                                                                                                                                                                                                                                    |
| CCCC       | No                | PROG-IMT policy                                                                                                                                    | Data can be shared on a scientific collaborative basis (Contact: <a href="mailto:klchien@ntu.edu.tw">klchien@ntu.edu.tw</a> )                                                                                                                                                                                                                                                                      |
| CHS        | Yes               | None, available via BioLincc                                                                                                                       | <a href="https://biolincc.nhlbi.nih.gov/studies/chs/">https://biolincc.nhlbi.nih.gov/studies/chs/</a>                                                                                                                                                                                                                                                                                              |
| CMCS       | No                | PROG-IMT policy                                                                                                                                    | Data can be shared on a scientific collaborative basis (Contact: <a href="mailto:ejingliu@163.com">ejingliu@163.com</a> )                                                                                                                                                                                                                                                                          |
| CSN        | No                | PROG-IMT policy                                                                                                                                    | Data can be shared on a scientific collaborative basis (requests to the CSN steering committee, contact: <a href="mailto:rafizzo@unina.it">rafizzo@unina.it</a> )                                                                                                                                                                                                                                  |
| DIWA       | No                | Swedish law regarding personal information, PROG-IMT policy                                                                                        | Data can be shared on a scientific collaborative basis (Contact: <a href="mailto:Goran.Bergstrom@hjl.gu.se">Goran.Bergstrom@hjl.gu.se</a> )                                                                                                                                                                                                                                                        |
| EAS        | No                | The study has to approve of such sharing for ethical reason, PROG-IMT policy                                                                       | Data can be shared on a scientific collaborative basis (ethical committee of Edinburgh University, contact: <a href="mailto:Stela.McLachlan@ed.ac.uk">Stela.McLachlan@ed.ac.uk</a> )                                                                                                                                                                                                               |
| Study      | Third party       | Restrictions against public data sharing                                                                                                           | Availability and contact                                                                                                                                                                                                                                                                                                                                                                           |

|                  | <b>owned</b> |                                                                                                                                                                                                    |                                                                                                                                                                                                                                                           |
|------------------|--------------|----------------------------------------------------------------------------------------------------------------------------------------------------------------------------------------------------|-----------------------------------------------------------------------------------------------------------------------------------------------------------------------------------------------------------------------------------------------------------|
| EPICARDIAN       | No           | PROG-IMT policy                                                                                                                                                                                    | Data can be shared on a scientific collaborative basis (Contact: <a href="mailto:rafael.gabriel@salud.madrid.org">rafael.gabriel@salud.madrid.org</a> )                                                                                                   |
| EVA              | Yes          | PROG-IMT policy                                                                                                                                                                                    | Data can be shared on a scientific collaborative basis (Contact: <a href="mailto:jean-philippe.empana@inserm.fr">jean-philippe.empana@inserm.fr</a> )                                                                                                     |
| HOORN            | Yes          | The informed consent specifically stated data will stay with the researchers of VUmc, except for scientific collaborations.                                                                        | Study data are available upon request. Data requests can be sent to the Hoorn Study research group at <a href="mailto:hoornstudy@vumc.nl">hoornstudy@vumc.nl</a> .                                                                                        |
| IMPROVE          | Yes          | There are legal (consortium agreement restrictions) and ethical (lack of patient's consensus for public data sharing) restrictions regarding public data sharing.                                  | Data can be shared on a collaborative basis (Contact: <a href="mailto:damiano.baldassarre@unimi.it">damiano.baldassarre@unimi.it</a> )                                                                                                                    |
| INVADE           | Yes          | There are legal restrictions due to the policy of the AOK (data owner)                                                                                                                             | Data can be shared on a scientific collaborative basis (Contact: <a href="mailto:d.sander@mac.com">d.sander@mac.com</a> )                                                                                                                                 |
| KIHD             | Yes          | Legal restrictions                                                                                                                                                                                 | Data can be shared on a scientific collaborative basis upon application (University of Eastern Finland, represented by the Institute of Public Health and Clinical Nutrition, contact: <a href="mailto:jussi.kauhanen@uef.fi">jussi.kauhanen@uef.fi</a> ) |
| Landecho et al.  | No           | PROG-IMT policy                                                                                                                                                                                    | Data can be shared on a scientific collaborative basis ( <a href="mailto:mflandecho@unav.es">mflandecho@unav.es</a> )                                                                                                                                     |
| MDCS             | Yes          | Swedish law regarding personal information, PROG-IMT policy                                                                                                                                        | It is possible to apply for data from Malmö Diet and Cancer steering committee for scientific research (Contact: <a href="mailto:gunnar.engstrom@med.lu.se">gunnar.engstrom@med.lu.se</a> ).                                                              |
| Niguarda-Monzino | Yes          | There are legal (consortium agreement restrictions) and ethical (lack of patient's consensus for public data sharing) restrictions regarding public data sharing.                                  | Data can be shared on a collaborative basis (Contact: <a href="mailto:damiano.baldassarre@unimi.it">damiano.baldassarre@unimi.it</a> )                                                                                                                    |
| NOMAS /INVEST    | Yes          | Inform consents that our subjects signed restrict the sharing of individual data as well as group sharing to limited datasets with a prior approval from the respective study steering committees. | Contact NOMAS/INVEST steering committee or <a href="mailto:TRundek@med.miami.edu">TRundek@med.miami.edu</a> .                                                                                                                                             |
| OSACA-2          | No           | PROG-IMT policy                                                                                                                                                                                    | Data can be shared on a scientific collaborative basis ( <a href="mailto:kkitagawa@nij.twmu.ac.jp">kkitagawa@nij.twmu.ac.jp</a> )                                                                                                                         |

| Study     | Third party owned | Restrictions against public data sharing                    | Availability and contact                                                                                                                                                                                            |
|-----------|-------------------|-------------------------------------------------------------|---------------------------------------------------------------------------------------------------------------------------------------------------------------------------------------------------------------------|
| PIVUS     | No                | Swedish law regarding personal information, PROG-IMT policy | Data can be shared on a collaborative basis ( <a href="mailto:lars.lind@medsci.uu.se">lars.lind@medsci.uu.se</a> )                                                                                                  |
| PLIC      | No                | Legal restrictions, PROG-IMT policy                         | Data can be shared on a collaborative basis ( <a href="mailto:alberico.catapano@unimi.it">alberico.catapano@unimi.it</a> )                                                                                          |
| RIAS      | No                | PROG-IMT policy                                             | Data can be shared on a scientific collaborative basis ( <a href="mailto:Daniel.Staub@usb.ch">Daniel.Staub@usb.ch</a> )                                                                                             |
| Rotterdam | Yes               | Legal restrictions prohibit sharing of data                 | Contact Rotterdam steering committee (Contact: <a href="mailto:o.franco@erasmusmc.nl">o.franco@erasmusmc.nl</a> ).                                                                                                  |
| SAPHIR    | No                | PROG-IMT policy                                             | Data can be shared on a scientific collaborative basis ( <a href="mailto:B.Iglseder@salk.at">B.Iglseder@salk.at</a> )                                                                                               |
| SHIP      | Yes               | Legal restrictions prohibit sharing of data                 | Data use, also for quality assurance issues, can be applied for via our websites ( <a href="http://www.community-medicine.de">www.community-medicine.de</a> ) according to a standardized procedure.                |
| SPARC     | No                | Ethical                                                     | Can be accessed upon request to David Spence or the ethics board of Western University, London, Canada with submission of an ethics protocol (Contact: <a href="mailto:dspence@robarts.ca">dspence@robarts.ca</a> ) |
| Tromsø    | Yes               | Legal restrictions prohibit sharing of data                 | Data can be shared on a scientific collaborative basis (contact steering committee or <a href="mailto:ellisiv.mathiesen@uit.no">ellisiv.mathiesen@uit.no</a> )                                                      |

\* For the purpose of the current analysis, the AtheroGene data were analysed by a member of the Mainz biometric team – Irene Schmidtman – following specific statistic models provided by central statistics in Cambridge, and only the resulting estimates were delivered for pooling to central statistics. The authors of the current paper outside the Mainz team received no access privileges to the AtheroGene data.
