# Supplementary material for: Predictive value for cardiovascular events of common carotid intima media thickness and its rate of change in individuals at high cardiovascular risk – Results from the PROG-IMT collaboration
Source: PubMed Central journal article supplement (PMC5896895; doi:10.1371/journal.pone.0191172), 2018-04-12
Supplement: pone.0191172.s004.pdf [file pone.0191172.s004.pdf]

## List of collaborators

### within the PROG-IMT study group, current from 10<sup>th</sup> June 2016

Stefan Agewall, MD, PhD, Prof.  
Institute of Clinical Sciences, University  
of Oslo, Oslo, Norway

and  
Department of Cardiology, Oslo  
University Hospital Ullevål, Oslo,  
Norway

Tadao Akizawa, MD, PhD, Prof  
Division of Nephrology, Department of  
Medicine, Showa University School of  
Medicine, Tokyo, Japan

Mayuko Amaha, MD  
Division of Nephrology, Department of  
Internal Medicine, Shinmatsudo Central  
General Hospital, Chiba, Japan

Mauro Amato, PhD  
Centro Cardiologico Monzino, IRCCS,  
Milan, Italy

Steen Andersen, MD, DMSc  
Steno Diabetes Center, Gentofte,  
Denmark

Sigmund A. Anderssen, PhD, Prof  
Norwegian School of Sports Sciences,  
Oslo, Norway

Aleksandra Araszkiwicz, MD, PhD,  
Assoc. Prof.  
Department of Internal Medicine and  
Diabetology, Poznan University of  
Medical Sciences, Poznan, Poland

Folkert W. Asselbergs, MD, PhD, Assoc.  
Prof.  
Department of Cardiology, Division Heart  
& Lungs, University Medical Center  
Utrecht, Utrecht, the Netherlands

Gülay Asçi, Prof. Dr.  
Nefroloji Bilim Dalı, Tıp Fakültesi, Ege  
Üniversitesi, Bornova-Izmir, Turkey

Jang-Ho Bae, MD, PhD, FACC.  
College of Medicine, Konyang University  
Hospital, Daejeon, Korea  
and  
Heart Center, Konyang University  
Hospital, Daejeon, Korea

Tatyana Balakhonova, MD, PhD, Prof.  
Ultrasound Vascular  
Laboratory, Cardiology Research Center,  
Moscow, Russia

Damiano Baldassarre, PhD, Prof  
Centro Cardiologico Monzino, IRCCS,  
Milan, Italy  
and  
Dipartimento di Scienze Farmacologiche  
e Biomolecolari, Università di Milano,  
Milan, Italy

Edith Beishuizen  
Department of General Internal Medicine,  
Leiden University Medical Center,  
Leiden, the Netherlands

Oscar Beloqui, MD, PhD  
Department of Internal Medicine,  
University Clinic of Navarra, Navarra,  
Spain

Gerald Berenson, MD, Prof.  
Department of Medicine, Pediatrics,  
Biochemistry, Epidemiology, Tulane  
University School of Medicine and  
School of Public Health and Tropical  
Medicine, New Orleans, USA

Göran Bergström, MD, PhD, Prof  
Wallenberg Laboratory for  
Cardiovascular Research, Sahlgrenska  
Academy, Gothenburg University,  
Göteborg, Sweden

Enrique Bernal, MD, PhD  
Infectious Diseases Unit, Hospital Reina  
Sofía, Murcia, Spain

Sebastjan Bevc, MD, PhD, Assist Prof  
Department of Nephrology, Clinic for  
Internal Medicine, University Medical  
Centre Maribor, Maribor, Slovenia

Lokpal Bhatia, MB BCH  
Faculty of Medicine, Human Development  
& Health Academic Unit, University of  
Southampton - Southampton General  
Hospital, Southampton, UK  
and  
Southampton NIHR Biomedical Research  
Centre, University Hospital Southampton  
- Southampton General Hospital, ,

Horst Bickel, PhD  
Department of Psychiatry and  
Psychotherapy, Technische Universität  
München, Munich, Germany

Stefan Blankenberg, MD, Prof.  
2nd Department of Medicine, Johannes  
Gutenberg-Universität, Mainz, Germany  
and  
Department of Cardiology, University  
Hospital Hamburg-Eppendorf, Hamburg,  
Germany

Peter J. Blankestijn  
Department of Nephrology, University  
Medical Center Utrecht, Utrecht, The  
Netherlands

James A Blumenthal, PhD  
Department of Psychiatry and Behavioral  
Sciences, Duke University Medical  
Center, Durham, NC 27710, USA

Lena Bokemark, MD, PhD  
Wallenberg Laboratory for  
Cardiovascular Research, Institution for  
Medicine, Department for Molecular and  
Clinical Medicine, Sahlgrenska Academy,  
Gothenburg University, Gothenburg,  
Sweden

Jackie Bosch, MSc  
Population Health Research Institute,  
McMaster University, Hamilton, Ontario,  
Canada

Michiel L. Bots, MD, PhD, Prof  
Julius Center for Health Sciences and  
Primary Care, University Medical Center  
Utrecht, Utrecht, the Netherlands

Frank P. Brouwers, MD, PhD  
Department of Cardiology, University  
Medical Center Groningen, Groningen,  
the Netherlands

Christopher D. Byrne, MB BCH, PhD,  
Prof.  
Faculty of Medicine, Human Development  
& Health Academic Unit, University of  
Southampton - Southampton General  
Hospital, Southampton, UK  
and  
Southampton NIHR Biomedical Research  
Centre, University Hospital Southampton  
- Southampton General Hospital, ,

Alpaslan Bülbül, MPH  
Department of Neurology, Goethe  
University, Frankfurt am Main, Germany

Philip C. Calder, PhD, Prof.  
Faculty of Medicine, Human Development  
& Health Academic Unit, University of  
Southampton - Southampton General  
Hospital, Southampton, UK  
and  
Southampton NIHR Biomedical Research  
Centre, University Hospital Southampton  
- Southampton General Hospital, ,

Yong-Jun Cao, MD, PhD  
Department of Neurology, Institute of  
Neuroscience, the Second Affiliated  
Hospital of Soochow University,  
Soochow, China

Samuela Castelnovo, PhD  
Centro Dislipidemie E. Grossi  
Paoletti, Ospedale Ca' Granda di Niguarda  
, Milan, Italy

Alberico Catapano, PhD, Prof.  
IRCSS Multimedica, Milan, Italy  
and  
Department of Pharmacological and  
Biomolecular Sciences, University of  
Milan, Milan, Italy

Chen-Huan Chen, Prof, MD  
National Yang-Ming University, Taipei,  
Taiwan

Kuo-Liong Chien, MD, Prof  
Institute of Epidemiology and Preventive  
Medicine, College of Public  
Health, National Taiwan University,  
Taipei, Taiwan

Ana Rosa Cunha, PhD  
State University of Rio de Janeiro, Rio de Janeiro, Brazil

Francois Dabis, MD, PhD, Prof.  
Centre de Recherche INSERM  
U.897, Institut de Santé Publique,  
Epidémiologie et Développement  
(ISPAD), Université Victor Segalen  
Bordeaux 2, Bordeaux Cedex, France

Jesse Dawson, Dr.  
Institute of Cardiovascular and Medical  
Sciences, University of Glasgow,  
Glasgow, UK

Ralph A. DeFronzo, MD  
University of Texas Health Science  
Center, San Antonio, USA

Jaqueline .M. Dekker, Prof  
Department of Epidemiology and  
Biostatistics, University Medical Center ,  
Amsterdam, the Netherlands  
and  
EMGO Institute for Health and Care  
Research, VU University Medical Center,  
Amsterdam, the Netherlands

Moise Desvarieux, MD, PhD, Assoc.  
Prof.  
Department of Epidemiology, Mailman  
School of Public Health, Columbia  
University, New York, USA

Chrystosomos Dimitriadis, MD  
University Department of Nephrology,  
Hippokraton General Hospital,  
Thessaloniki, Greece

Pierre Ducimetiere, Prof.  
University Paris Sud XI, Kremlin-  
Bicêtre, Le Kremlin-Bicêtre, France

Marcus Dörr, MD, Prof.  
Department B for Internal Medicine,  
University Medicine Greifswald,  
Greifswald, Germany  
and  
German Center for Cardiovascular  
Research (DZHK), partner site Greifswald  
, Greifswald, Germany

Helen Eddington, MD  
University Hospitals Birmingham,  
Birmingham, UK

Robert Ekart, MD, PhD, Assist. Prof  
Department of Dialysis, Clinic for Internal  
Medicine, University Medical Centre  
Maribor, Maribor, Slovenia

Jean Philippe Empana, MD, PhD  
Paris Cardiovascular Research Centre  
(PARCC), University Paris Descartes,  
Sorbonne Paris Cité, UMR-S970, Paris,  
France

Gunnar Engström, MD, PhD, Prof.  
Department of Clinical Sciences in  
Malmö, Lund University, Malmö, Sweden

Mark A. Espeland, PhD, Prof.  
Department of Biostatistical Sciences,  
Wake Forest School of Medicine,  
Winston-Salem, NC, USA

Christine Espinola-Klein, MD, Prof.  
2nd Department of Medicine, Johannes-  
Gutenberg University, Mainz, Germany

Ramon Estruch, MD, PhD  
Endocrinology & Nutrition Service,  
Hospital Clinic, Barcelona, Spain

Thorleif Etgen, MD, PD  
Department of Neurology, Kliniken  
Südstbayern, Klinikum Traunstein,  
Traunstein, Germany  
and  
Department of Psychiatry and  
Psychotherapy, Technische Universität  
München, Munich, Germany

Marat Ezhov, MD, PhD  
Atherosclerosis Department, Cardiology  
Research Center , Moscow, Russia

Oscar H. Franco, MD, PhD, FESC, FFPH,  
Prof.  
Department of Epidemiology, Erasmus  
MC, University Medical Center  
Rotterdam, Rotterdam, the Netherlands

Beat Frauchiger, MD, Prof.  
Department of Internal Medicine,  
Division of Angiology, Kantonsspital  
Frauenfeld, Frauenfeld, Switzerland

Alfonsa Friera, MD  
Radiology Department, Hospital  
Universitario de la Princesa, Universidad  
Autónoma de Madrid, Madrid, Spain

Rafael Gabriel, Prof., MD  
Escuela Nacional de Sanidad, Instituto de  
Salud Carlos III, Madrid, Spain

Greg Gamble, MSc  
Department of Medicine, The University  
of Auckland, Auckland, New Zealand

Lu Gao, MSc  
MRC Biostatistics Unit, Institute of Public  
Health, University Forvie Site, Cambridge,  
UK

Rachel Georgiou  
Salford Royal Hospitals NHS  
Foundation Trust, Salford, UK

Hertzel C. Gerstein, MD, MSc  
Department of Medicine and Population  
Health Research Institute, McMaster  
University , Hamilton, Ontario, Canada

Paolo Gesele, Prof, MD, PhD  
Department of Internal, Division of  
Internal and Cardiovascular  
Medicine, University of Perugia, Perugia,  
Italy

Liliana Grigore, MD  
Centro Sisa per lo Studio della  
Aterosclerosi, Bassini Hospital, Cinisello  
Balsamo, Italy

Diederick E. Grobbee, MD, PhD, Prof  
Julius Center for Health Sciences and  
Primary Care, University Medical Center  
Utrecht, Utrecht, the Netherlands

Muriel P.C. Grooteman  
Institute for Cardiovascular Research VU  
Medical Center (ICaR-VU), VU Medical  
Center, Amsterdam, The Netherlands  
and  
Department of Nephrology, VU Medical  
Center, Amsterdam, The Netherlands

Giuseppe Guglielmini, MD, PhD  
Division of Internal and Cardiovascular  
Medicine, Department of  
Medicine, University of Perugia, Perugia,  
Italy

Félix Gutiérrez, MD, PhD  
Clinical Medicine, Hospital General  
Universitario de Elche, University Miguel  
Hernández, Elche, Alicante, Spain

Markolf Hanefeld, Prof  
Study Centre Professor Hanefeld,  
GWT, TU Dresden, Dresden, Germany

Apostolos I. Hatzitolios, MD, PhD,  
FESH, Prof.  
Head of first Propedeutic Department of  
Internal Medicine, Medical  
School, Aristotle University of  
Thessaloniki - AHEPA Hospital,  
Thessaloniki, Greece

Bo Hedblad, MD, PhD, Prof  
Department of Clinical Sciences in  
Malmö, Lund University, Malmö, Sweden

Frans A. Helmond, PhD  
Merck Research Laboratories,  
Kenilworth, NJ, USA

Loghman Henareh, M.D., Ph.D., Prof.  
Department of Medicine, Huddinge  
(MedH), H7, Karolinska Institutet ,  
Stockholm, Sweden

Peter Higgins, Dr.  
Institute of Cardiovascular and Medical  
Sciences, University of Glasgow,  
Glasgow, UK

Alan Hinderliter, MD  
Department of Medicine, University of  
North Carolina, Chapel Hill, USA

Albert Hofman, MD, PhD, Prof.  
Department of Epidemiology, Erasmus  
University Medical Center, Rotterdam,  
the Netherlands

Radovan Hojs, MD, PhD, Prof  
Department of Nephrology, Clinic for  
Internal Medicine, University Medical  
Centre Maribor, Maribor, Slovenia  
and  
Faculty of Medicine, University of  
Maribor, Maribor, Slovenia

Hirokazu Honda, MD, PhD, Assoc. Prof.  
Showa University Koto Toyosu Hospital,  
Division of Nephrology, Department of  
Medicine  
Tokyo, Japan

Satoshi Hoshida, MD  
Department of Medicine, Division of  
Cardiovascular Medicine, Jichi Medical  
University School of Medicine, Tochigi,  
Japan

Menno V. Huisman  
Department of Thrombosis and  
Hemostasis, Leiden University Medical  
Center, Leiden, the Netherlands

Joseph Hung, Winthrop Professor, MBBS  
(hons) FRACP FACC  
Department of Cardiovascular Medicine,  
Sir Charles Gairdner Hospital, Nedlands,  
Australia  
and  
School of Medicine and Pharmacology,  
University of Western Australia,  
Nedlands, Australia

Bernhard Iglseder, MD, Prof  
Paracelsus Medical University, Salzburg,  
Austria  
and  
Department of Geriatric Medicine,  
Gemeinnützige Salzburger  
Landeskliniken Betriebsgesellschaft  
GmbH Christian-Doppler-Klinik,  
Salzburg, Austria

M. Arfan Ikram, MD, PhD, Assoc. Prof.  
Department of Epidemiology, Erasmus  
University Medical Center, Rotterdam,  
the Netherlands  
and  
Department of Neurology, Erasmus  
University Medical Center, Rotterdam,  
the Netherlands  
and  
Department of Radiology, Erasmus  
University Medical Center, Rotterdam,  
the Netherlands

Raffaele Izzo, MD, Prof.  
School of Medicine, Federico II  
University, Naples, Italy

Lisa M Jamieson, Assoc Prof  
Australian Research Centre for Population  
Oral Health, School of Dentistry, The  
University of Adelaide, Adelaide,  
Australia

Tomas Jogestrand, M.D., Ph.D., Prof.  
Department of Laboratory Medicine  
(LABMED), H5, Division of clinical  
physiology, Karolinska  
Universitetssjukhuset, Huddinge,  
Stockholm, Sweden

Stein Harald Johnsen, MD, PhD, Assoc.  
Prof.  
Department of Clinical Medicine,  
University of Tromsø, Tromsø, Norway  
and  
Department of Neurology, University  
Hospital of Northern Norway, Tromsø,  
Norway

Aleksandar Jovanovic, MD, PhD, Prof  
Faculty of Medicine, University of  
Prishtina, Prishtina/Kosovska Mitrovica,  
Serbia

Anna Kablak-Ziembicka, MD, PhD, Prof.  
Department of Interventional  
Cardiology, Institute of  
Cardiology, Collegium Medicum  
Jagiellonian University, Krakow, Poland

Philip Kalra, MD, PhD, Prof.  
Department of Renal  
Medicine, Manchester Academic Health  
Sciences Centre, Salford Royal Hospital,  
Manchester, UK

Kostas Kapellas  
Australian Research Centre for Population  
Oral Health, School of Dentistry, The  
University of Adelaide, Adelaide,  
Australia

Kazuomi Kario  
Department of Medicine, Division of  
Cardiovascular Medicine, Jichi Medical  
University School of Medicine, Tochigi,  
Japan

John JP Kastelein, MD, Prof  
Department of Vascular  
Medicine, Academic Medical  
Center, University of Amsterdam,  
Amsterdam, the Netherlands

Akihiko Kato, MD, Prof.  
Division of Blood Purification,  
Hamamatsu University Hospital,  
Hamamatsu, Japan

Jussi Kauhanen, MD, Prof  
Institute of Public Health and Clinical  
Nutrition, University of Eastern Finland,  
Kuopio Campus, Kuopio, Finland

Maryam Kavousi, MD, PhD  
Department of Epidemiology and  
Biostatistics, Erasmus Medical Center,  
Rotterdam, the Netherlands

Masanori Kawasaki, MD, PhD, Assoc.  
Prof  
Department of Cardiology, Gifu  
University Graduate School of Medicine,  
Gifu, Japan

Kerstin Kempf, PhD  
Düsseldorf Catholic Hospital Group  
(VKKD), West-German Centre of  
Diabetes and Health (WDGZ),  
Düsseldorf, Germany

Stefan Kiechl, MD, Prof  
Department of Neurology, Medical  
University Innsbruck, Innsbruck, Austria

Jang-Young Kim, MD PhD  
Department of Cardiology, Institute of  
Genomic Cohort, College of Medicine  
Yonsei University, Wonju, Korea

Kazuo Kitagawa, MD, PhD  
Department of Neurology, Tokyo  
Women's Medical University, Tokyo,  
Japan

Sverre E. Kjeldsen, MD, PhD, Prof.  
Department of Cardiology, Ullevaal  
University Hospital, Oslo, Norway

Sang Back Koh, MD PhD  
Preventive Medicine, College of  
Medicine, Institute of Genomic  
Cohort, Yonsei University, Wonju, Korea

Svetlana Kostic, MSc, MD  
Primarius Institute for Therapy and  
Rehabilitation, "Niska Banja", Nis, Serbia

Manuel F Landecho, MD, PhD  
Department of Internal Medicine,  
University Clinic of Navarra, Navarra,  
Spain

Tatjana Lazarevic, MA  
Faculty of Medicine, University of  
Kragujevac, Kragujevac, Serbia

Moo-Sik Lee, MD., PhD., Prof.  
College of Medicine, Konyang University  
Hospital, Daejeon, Korea  
and  
Department of Preventive Medicine,  
Konyang University, Daejeon, Korea

Seung Hwan Lee, M.D., PhD, Prof.  
Department of Cardiology, College of  
Medicine, Yonsei University, Wonju,  
Korea

Wattana Leowattana, Assoc. Prof.  
Department of Clinical Tropical  
Medicine, Faculty of Tropical  
Medicine, Mahidol University,  
Rachatawee, Bangkok, Thailand

Ximing Liao, BSc, MSc, PhD  
Department of Neurology, Goethe  
University, Frankfurt am Main, Germany

Hung-Ju Lin, MD  
Department of Internal Medicine,  
National Taiwan University Hospital,  
Taipei, Taiwan

Yao-Ping Lin, MD  
Taipei Veterans General Hospital,  
Taipei, Taiwan

Lars Lind, MD, PhD, Prof  
Department of Medicine, Uppsala University, Uppsala, Sweden

Chun-Feng Liu, MD, PhD, Prof  
Department of Neurology, Institute of Neuroscience, the Second Affiliated Hospital of Soochow University, Soochow, China

Jing Liu, MD, PhD, Prof.  
Department of Epidemiology, Beijing Institute of Heart, Lung and Blood Vessel Diseases, Beijing Anzhen Hospital, Capital Medical University, Beijing, China

Eva Lonn, MD, MSc, FRCPC, FACC, Prof.  
Department of Medicine and Population Health Research Institute, McMaster University, Hamilton, Ontario, Canada

Matthias W. Lorenz, MD, PD  
Department of Neurology, Goethe University, Frankfurt am Main, Germany

Dongmei Ma, MSc  
Institute of Child and Adolescent Health, School of Public Health, Peking University, Beijing, China

Dianna Magliano, Assoc. Prof  
BakerIDI Heart and Diabetes Institute, Melbourne, Australia

Stephan Martin, Prof. Dr.  
Düsseldorf Catholic Hospital Group (VKKD), West-German Centre of Diabetes and Health (WDGZ), Düsseldorf, Germany

Mar Masiá, MD, PhD  
Clinical Medicine, Hospital General Universitario de Elche, University Miguel Hernández, Elche, Alicante, Spain

Ellisiv B. Mathiesen, MD, PhD, Prof.  
Department of Clinical Medicine, UiT The Arctic University of Norway, Tromsø, Norway

Wolfgang Mayer-Berger  
Centre for Cardiovascular Rehabilitation, Leichlingen, Germany

Barry P. McGrath, Prof  
Department of Vascular Sciences, Monash University, Dandenong Hospital, Melbourne, Australia

Stela McLachlan, PhD  
Centre for Population Health Sciences, Usher Institute of Population Health Sciences and Informatics, University of Edinburgh, Edinburgh, UK

John McNeil, PhD, Prof., MBBS  
School of Public Health and Preventive Medicine, Monash University, Melbourne, Australia

Brendan McQuillan, Assoc. Prof, MBBS PhD FRACP  
Department of Cardiovascular Medicine, Sir Charles Gairdner Hospital, Nedlands, Australia  
and  
School of Medicine and Pharmacology, University of Western Australia, Nedlands, Australia

Patrick Mercié, Prof  
Service de Médecine Interne, Hôpital Saint-André, CHU de Bordeaux, Bordeaux, France

Rino Migliacci, MD  
Division of Internal Medicine, Ospedale della Valdichiana "S. Margherita", Cortona, Italy

Dragan Mijalkovic, MD  
Primarius, Polyclinic "Kardiomedika", Nis, Serbia

Firouzeh Moeinzadeh, MD  
Isfahan Kidney Disease Research Center, Isfahan University of Medical Sciences, Isfahan, Iran

Mojgan Mortazavi, MD, Assoc. Prof.  
Nephrology department, Isfahan Kidney Diseases Research Center, Isfahan University of medical sciences, Isfahan, Iran

Titus Francis Msoka, MD, PhD  
Kilimanjaro Christian Medical Centre (KCMC), Moshi, Tanzania  
and  
Kilimanjaro Clinical Research Institute (KCRI), Moshi, Tanzania

Veronica A. Myasoedova, MD, PhD  
Laboratory of Angiopathology, Institute of General Pathology and Pathophysiology, Moscow, Russia

Michiaki Nagai, MD  
Department of Medicine, Division of Cardiovascular Medicine, Jichi Medical University School of Medicine, Tochigi, Japan

Tsukasa Nakamura, MD, PhD  
Division of Nephrology, Department of Internal Medicine, Shinmatsudo Central General Hospital, Chiba, Japan

Prabath W.B. Nanayakkara  
Department of Clinical Neurophysiology, Medical Center, VU University Amsterdam, Amsterdam, the Netherlands

Dariusz Naskret, MD, PhD  
Department of Internal Medicine and Diabetology, Poznan University of Medical Sciences, Poznan, Poland

Mario Fritsch Neves, MD, PhD  
State University of Rio de Janeiro, Rio de Janeiro, Brazil

Pythia T. Nieuwkerk, PhD  
Department of Medical Psychology, Academic Medical Center, Amsterdam, the Netherlands

Giel Nijpels, MD, PhD  
Department of General Practice, VU University Medical Center, Amsterdam, the Netherlands  
and  
EMGO Institute for Health and Care Research, VU University Medical Center, Amsterdam, the Netherlands

Giuseppe D. Norata, PhD  
Dipartimento di Scienze Farmacologiche e Biomolecolari, Università degli Studi di Milano, Milan, Italy  
and  
SISA Center for the Study of Atherosclerosis, Bassini Hospital, Cinisello Balsamo, Italy

George Ntaios, MD, MSc (Stroke Med), PhD, FESO  
Department of Medicine, University of Thessaly, Larissa, Greece

Shuhei Okazaki, MD  
Department of Neurology, Osaka University Graduate School of Medicine, Osaka, Japan

Michael Hecht Olsen, MD, PhD, DMSc, Prof  
Cardiovascular and Metabolic Preventive Clinic, Department of Endocrinology, Odense University Hospital, Odense, Denmark

Alexander N. Orekhov, PhD, DSc  
Institute for atherosclerosis Research, Skolkovo Innovation Center, Moscow, Russia  
and  
Laboratory of Angiopathology, Institute of General Pathology and Pathophysiology, Moscow, Russia

Aikaterini Papagianni, MD, Assoc. Prof.  
University Department of Nephrology, Hippokraton General Hospital, Thessaloniki, Greece

Hyun Woong Park, M.D.  
College of Medicine, Konyang University Hospital, Daejeon, Korea

Grace Parraga, Dr  
Robarts Research Institute, Western University, London, Canada

Sharif Pasha  
Department of General Internal Medicine, Leiden University Medical Center, Leiden, the Netherlands

Matthieu Plichart, MD, PhD  
Assistance Publique, Hôpitaux de Paris,  
Hôpital Broca, Paris, France  
and  
Paris Cardiovascular Research Centre  
(PARCC), University Paris Descartes,  
Sorbonne Paris Cité, UMR-S970, Paris,  
France

Janice Pogue, PhD  
Population Health Research Institute,  
McMaster University, Hamilton, Ontario,  
Canada

Joseph F. Polak, MD, MPH, Prof  
Tufts University School of Medicine,  
Tufts Medical Center, Boston, USA

Holger Poppert, MD, PhD  
Department of Neurology, Technische  
Universität München, Munich, Germany

David Preiss, MD, PhD  
BHF Glasgow Cardiovascular Research  
Centre, University of Glasgow, Glasgow,  
UK

Jackie F. Price, MD  
Usher Institute of Population Health  
Sciences and Informatics, University of  
Edinburgh, Edinburgh, UK

Tadeusz Przewlocki, MD, PhD, Prof.  
Department of Interventional  
Cardiology, Institute of  
Cardiology, Collegium Medicum  
Jagiellonian University, Krakow, Poland

Joel Raichlen, MD  
AstraZeneca, Wilmington, DE, USA

Peter Reaven, MD, Prof.  
Dept. of Medicine, Phoenix VA Health  
Care System, University of Arizona,  
Phoenix, USA

Peter Reiss, MD, PhD, Prof.  
Amsterdam Institute for Global Health  
and Development, University of  
Amsterdam, Amsterdam, the Netherlands  
and  
Department of Global Health, Academic  
Medical Center, Amsterdam, the  
Netherlands

Christine Robertson, MBChB  
Centre for Population Health  
Sciences, Usher Institute of Population  
Health Sciences and  
Informatics, University of Edinburgh,  
Edinburgh, UK

Kimmo Ronkainen, MSc  
Institute of Public Health and Clinical  
Nutrition, University of Eastern Finland,  
Kuopio Campus, Kuopio, Finland

Emilio Ros, MD, PhD  
Endocrinology & Nutrition Service,  
Hospital Clínic, Barcelona, Spain

Signe Rosenlund, MD  
Steno Diabetes Center , Gentofte,  
Denmark

Peter Rossing, MD, DMSc, Prof.  
Steno Diabetes Center , Gentofte,  
Denmark

Maria Rosvall, MD, PhD, Assoc. Prof.  
Department of Clinical Sciences in  
Malmö, Lund University, Malmö, Sweden

Francesco Rozza, MD, Prof.  
Department of Medicine and Surgery,  
University of Salerno, Salerno, Italy

Tatjana Rundek, MD, PhD, Prof.  
Department of Neurology, Miller School  
of Medicine, University of Miami, Miami,  
USA

Mohammad Saadatnia, MD, Assoc. Prof.  
Al-Zahra Hospital, Isfahan University of  
Medical Sciences, Isfahan, Iran

Ralph L. Sacco, MD, MS, Prof.  
Department of Neurology, Miller School  
of Medicine, University of Miami, Miami,  
USA

Maya Safarova, M.D.  
Atherosclerosis Department, Cardiology  
Research Center , Moscow, Russia

Dirk Sander, MD, Prof  
Department of Neurology, Benedictus  
Hospital Tutzing & Feldafing, Feldafing,  
Germany  
and  
Department of Neurology, Technische  
Universität München, Munich, Germany

Kerstin Sander, MD, PD  
Department of Psychosomatic, Schön  
Klinik , Berchtesgaden Land, Germany

Eiichi Sato, MD  
Division of Nephrology, Department of  
Internal Medicine , Chiba, Japan

Naveed Sattar, MD, PhD, Prof  
BHF Glasgow Cardiovascular Research  
Centre, University of Glasgow, Glasgow,  
UK

Christos Savopoulos, MD, PhD, Assoc.  
Prof  
1st Propedeutic Department of Internal  
Medicine, Aristotles University of  
Thessaloniki, Thessaloniki, Greece

Frank Scheckenbach, MSc, PhD  
Department of Neurology, Goethe  
University, Frankfurt am Main, Germany

Caroline Schmidt, PhD, Assoc. Prof.  
Walleng Laboratory for Cardiovascular  
Research, University of Gothenburg,  
Gothenburg, Sweden

Irene Schmidtman, Dr.  
Institut fuer Medizinische Biometrie,  
Epidemiologie und Informatik (IMBEI),  
Universitätsmedizin Mainz, Mainz,  
Germany

Ulf Schminke, MD, Prof  
Department of Neurology, Greifswald  
University Clinic, Greifswald, Germany

Michael Schneider, Dr.  
Dept HR Services & Expertise  
Center, Boehringer Ingelheim Pharma  
GmbH & Co. KG , Ingelheim am Rhein,  
Germany  
and

Mannheim Institute for Public  
Health, Medical Faculty  
Mannheim, Ruprecht-Karls University  
Heidelberg, Mannheim, Germany

Ercan Sevinc Ok, MD  
Division of Nephrology, Izmir Bozyaka  
Education and Research Hospital, Izmir,  
Turkey

Norman Sharpe, MD, Prof.  
Heart Foundation, Ellerslie, Auckland,  
New Zealand

Patrick Sheridan, MSc  
Population Health Research Institute,  
McMaster University, Hamilton, Ontario,  
Canada

Andrew Sherwood, PhD  
Department of Psychiatry and Behavioral  
Sciences, Duke University Medical  
Center, Durham, NC 27710, USA

Cesare R. Sirtori, MD, PhD, Prof.  
Center of Dyslipidemias, Niguarda Ca'  
Granda Hospital, Milano, Italy

Matthias Sitzer, MD, Prof.  
Department of Neurology, Klinikum  
Herford, Herford, Germany  
and  
Department of Neurology, Goethe  
University, Frankfurt am Main, Germany

Michael Skilton, PhD  
Boden Institute of Obesity, Nutrition,  
Exercise and Eating Disorders, University  
of Sydney, Sydney, Australia

Patrick J Smith, PhD, MPH  
Department of Psychiatry and Behavioral  
Sciences, Duke University Medical  
Center, Durham, NC 27710, USA

Igor A. Sobenin, MD, PhD, DSc  
Laboratory of Angiopathology, Institute of  
General Pathology and Pathophysiology ,  
Moscow, Russia  
and  
Laboratory of Medical Genetics,  
Department of Cardiovascular  
Pathology, AM Myasnikov Institute of  
Clinical Cardiology, Russian Cardiology  
Research and Production Complex,  
Moscow, Russia

J. David Spence, MD, FRCPC, FAHA  
Stroke Prevention & Atherosclerosis  
Research Centre,Robarts Research  
Institute,Western University, London,  
Canada

Sathanur R. Srinivasan, PhD, Prof.  
Center for Cardiovascular Health,  
Department of Epidemiology,  
Biochemistry, Tulane University School  
of Public Health and Tropical Medicine,  
New Orleans, USA

Daniel Staub, MD, Prof.  
Department of Angiology, University  
Hospital Basel, Basel, Switzerland

CDA Stehouwer, MD, PhD, FESC  
Department of Internal Medicine and  
Cardiovascular Research Institute  
Maastricht (CARIM), Maastricht  
University Medical Centre, Maastricht,  
the Netherlands

Helmuth Steinmetz, MD, Prof  
Department of Neurology, Goethe  
University, Frankfurt am Main, Germany

Radojica Stolic, MD, PhD, Prof  
Faculty of Medicine, University of  
Kragujevac, Kragujevac, Serbia

Erik Stroes, MD, PhD  
Department of Vascular Medicine,  
Academic Medical Center, Amsterdam,  
the Netherlands

Ta-Chen Su, MD, PhD, Assoc. Prof.  
Department of Internal Medicine,  
National Taiwan University Hospital,  
Taipei, Taiwan

Carmen Suarez, MD, PhD  
Internal Medicine Department,Hospital  
Universitario de la Princesa,Universidad  
Autónoma de Madrid, Madrid, Spain

Ivan S. Tasic, MD, PhD, Prof.  
Faculty of Medicine,Institute for Therapy  
and Rehabilitation,University of Nis,  
"Niska Banja", Serbia

Rodolphe Thiébaud, Dr.  
Centre de Recherche INSERM  
U.897,Institut de Santé Publique,  
Epidémiologie et Développement  
(ISPAD),Université Victor Segalen  
Bordeaux 2, Bordeaux Cedex, France

Peter L. Thompson, Clinical Professor,  
MD, FRACP, FACC, MBA  
Heart Research Institute of WA and  
Department of Cardiovascular Medicine,  
Sir Charles Gairdner Hospital, Nedlands,  
Australia

Simon G. Thompson, DSc, Prof.  
Department of Public Health and Primary  
Care,School of Clinical  
Medicine,University of Cambridge,  
Cambridge, UK

Estefania Toledo, MD, MPH, PhD  
Centro de Investigación Biomédica en  
Red-Fisiopatología de la Obesidad y la  
Nutrición (CIBERObn), , Spain  
and  
Department of Preventive Medicine and  
Public Health, University of Navarra,  
Pamplona, Spain

Elena Tremoli, PhD, Prof  
Centro Cardiologico Monzino, IRCCS,  
Milan, Italy  
and  
Dipartimento di Scienze Farmacologiche  
e Biomolecolari, Università di Milano,  
Milan, Italy

Devjit Tripathy, MD, PhD  
University of Texas Health Science  
Center, San Antonio, USA

Tomi-Pekka Tuomainen, MD, PhD, Prof  
Institute of Public Health and Clinical  
Nutrition, University of Eastern Finland,  
Kuopio Campus, Kuopio, Finland

Aleksandra Uruska, MD, PhD  
Department of Internal Medicine and  
Diabetology, Poznan University of  
Medical Sciences, Poznan, Poland

Heiko Uthoff, MD  
Department of Angiology, University  
Hospital Basel, Basel, Switzerland

Fabrizio Veglia, PhD  
Centro Cardiologico Monzino, IRCCS,  
Milan, Italy

Frank L.J. Visseren, MD, Prof  
Department of Vascular Medicine,  
University Medical Centre Utrecht,  
Utrecht, the Netherlands

Henry Völzke, MD, Prof  
German Center for Cardiovascular  
Research (DZHK),partner site Greifswald  
, Greifswald, Germany  
and  
Institute for Community Medicine,  
SHIP/Clinical-Epidemiological Research,  
Greifswald, Germany

Kristian Wachtell, MD, PhD, Assoc. Prof.  
Department of Cardiology, Gentofte  
University Hospital, Copenhagen,  
Denmark

Matthew Walters, Prof.  
Institute of Cardiovascular and Medical  
Sciences,University of Glasgow,  
Glasgow, UK

Zhenghe Wang, MD  
Institute of Child and Adolescent Health,  
School of Public Health,Peking  
University, Beijing, China

Thapat Wannarong, MD  
Stroke Prevention & Atherosclerosis  
Research Centre,Robarts Research  
Institute,Western University, London,  
Canada  
and  
Department of Internal Medicine, Faculty  
of Medicine Siriraj Hospital, Mahidol  
University, Bangkok, Thailand

Gillian Whalley, PhD, Prof.  
Faculty of Social and Health Sciences,  
Unitec, Auckland, New Zealand

Johann Willeit, MD, Prof.  
Department of Neurology, Medical  
University Innsbruck, Innsbruck, Austria

Peter Willeit, PhD  
Department of Neurology, Medical  
University Innsbruck, Innsbruck, Austria  
and  
Department of Public Health and Primary  
Care,School of Clinical  
Medicine,University of Cambridge,  
Cambridge, UK

Miles D. Witham, Dr.  
Ninewells Hospital, Ageing and Health  
Ninewells Hospital,Ninewells Hospital &  
Medical School, Dundee, UK

Wuxiang Xie, MD, PhD, Assist. Prof.  
Department of Epidemiology, Beijing  
Institute of Heart, Lung and Blood Vessel  
Diseases,Beijing Anzhen Hospital,  
Capital Medical University, Beijing,  
China

Kiyofumi Yamada, MD, PhD  
Departments of Neurosurgery, Gifu  
University Graduate School of Medicine,  
Gifu, Japan

David N. Yanez, PhD, Assoc. Prof  
Department of Biostatistics, University of  
Washington, Seattle, USA

Shinichi Yoshimura, MD, PhD, Assoc.  
Prof.  
Departments of Neurosurgery, Gifu  
University Graduate School of Medicine,  
Gifu, Japan

Wen-Chung Yu, MD; Assoc. Prof  
National Yang-Ming University, Taipei,  
Taiwan  
and  
Division of Cardiology, Taipei Veterans  
General Hospital, Taipei, Taiwan

Salim Yusuf, MD, Dphil  
Department of Medicine and Population  
Health Research Institute, McMaster  
University, Hamilton, Ontario, Canada

Dong Zhao, MD, PhD, Prof.  
Department of Epidemiology,Beijing  
Institute of Heart, Lung and Blood Vessel  
Diseases,Beijing Anzhen Hospital,  
Capital Medical University, Beijing,  
China

Zhi-Yong Zou  
Institute of Child and Adolescent Health,  
School of Public Health, Peking  
University, Beijing, China

Sophia Zoungas, Assoc. Prof.  
School of Public Health and Preventive  
Medicine, Monash University,  
Melbourne, Australia

Dorota A. Zozulinska-Ziólkiewicz, MD,  
PhD, Prof.  
Department of Internal Medicine and  
Diabetology, Poznan University of  
Medical Sciences, Poznan, Poland

Eric de Groot, MD, PhD  
Imagelabonline &  
Cardiovascular, Eindhoven and Clinical  
Epidemiology and Biostatistics, Academic  
Medical Centre, Amsterdam, the  
Netherlands

Nicola de Luca, MD, Prof.  
School of Medicine, Federico II  
University, Naples, Italy

Pieter M. ter Wee, Prof Dr.  
Department of Nephrology, Medical  
Center, VU University Amsterdam,  
Amsterdam, the Netherlands

Michiel A. van Agtmael, MD, PhD  
Department of Internal Medicine, VU  
University Medical Center, Amsterdam,  
the Netherlands

Wiek van Gilst, PhD, Prof  
Department of Experimental Cardiology,  
University Medical Center Groningen,  
Groningen, the Netherlands

Marit G. A. van Vonderen, MD, PhD  
Medical Center Leeuwarden,  
Leeuwarden, the Netherlands

Statistical Advisor:

Simon Thompson, DSc, Prof  
Department of Public Health and Primary  
Care, School of Clinical  
Medicine, University of Cambridge,  
Cambridge, UK

Principal Investigator:

Matthias W. Lorenz, MD, Prof.  
Department of Neurology, Goethe  
University, Frankfurt am Main, Germany
